# Supplementary material
Source: PubMed Central journal article supplement (PMC2863053)

# Supporting Information

## Water-Soluble Triarylphosphines as Biomarkers for Protein S-Nitrosation

Erika Bechtold, Julie A. Reisz, Chananat Klomsiri, Allen W. Tsang, Marcus W. Wright, Leslie B. Poole, Cristina M. Furdui, S. Bruce King

Department of Chemistry, Wake Forest University, Winston-Salem, NC 27109, Center for Structural Biology, Department of Biochemistry, Wake Forest University School of Medicine, Winston-Salem, NC 27157, and Department of Molecular Medicine, Wake Forest University School of Medicine, Winston-Salem, NC 27157

E-mail: kingsb@wfu.edu

### Supporting Information

|     |                                                                                  |           |
|-----|----------------------------------------------------------------------------------|-----------|
| 1.  | <sup>31</sup> P NMR of the ( <sup>13</sup> C)-Cys-SNO and TXPTS reaction         | S2        |
| 2.  | <sup>13</sup> C NMR of the ( <sup>13</sup> C)-Cys-SNO and TXPTS reaction         | S3        |
| 3.  | LC-MS of the Cys-SNO and TXPTS reaction                                          | S4        |
| 4.  | LC-MS of the ( <sup>13</sup> C)Cys-SNO and TXPTS reaction                        | S5        |
| 5.  | LC-MS of the GSNO and TXPTS reaction                                             | S6        |
| 6.  | LC-MS of the <sup>15</sup> N-GSNO/TXPTS reaction                                 | S7        |
| 7.  | <sup>31</sup> P NMR of the GSH and TXPTS reaction                                | S8        |
| 8.  | <sup>31</sup> P NMR of the GSSG and TXPTS reaction                               | S8        |
| 9.  | <sup>31</sup> P NMR showing the treatment of the GSNO/TXPTS mixture with DTT     | S9        |
| 10. | UV/Vis of GSNO (16 mM) with TXPTS (32 mM)                                        | S10       |
| 11. | <sup>31</sup> P NMR of the reaction between cysteine and cystine with TXPTS      | S11       |
| 12. | <sup>31</sup> P NMR showing the treatment of the Cys-SNO/TXPTS reaction with DTT | S12       |
| 13. | ESI-TOF MS of the reaction between AhpC-SH with TXPTS                            | S13       |
| 14. | ESI-TOF MS of labeled AhpC-S-P+ in normal and denaturing conditions              | S14       |
| 15. | <sup>31</sup> P NMR of <b>1</b>                                                  | S15       |
| 16. | CRYSTAL STRUCTURE ANALYSIS REPORT and TABLES for <b>1</b>                        | S16 – S31 |

# 1. $^{31}\text{P}$ NMR of the ( $^{13}\text{C}$ )-Cys-SNO and TXPTS reaction

A.

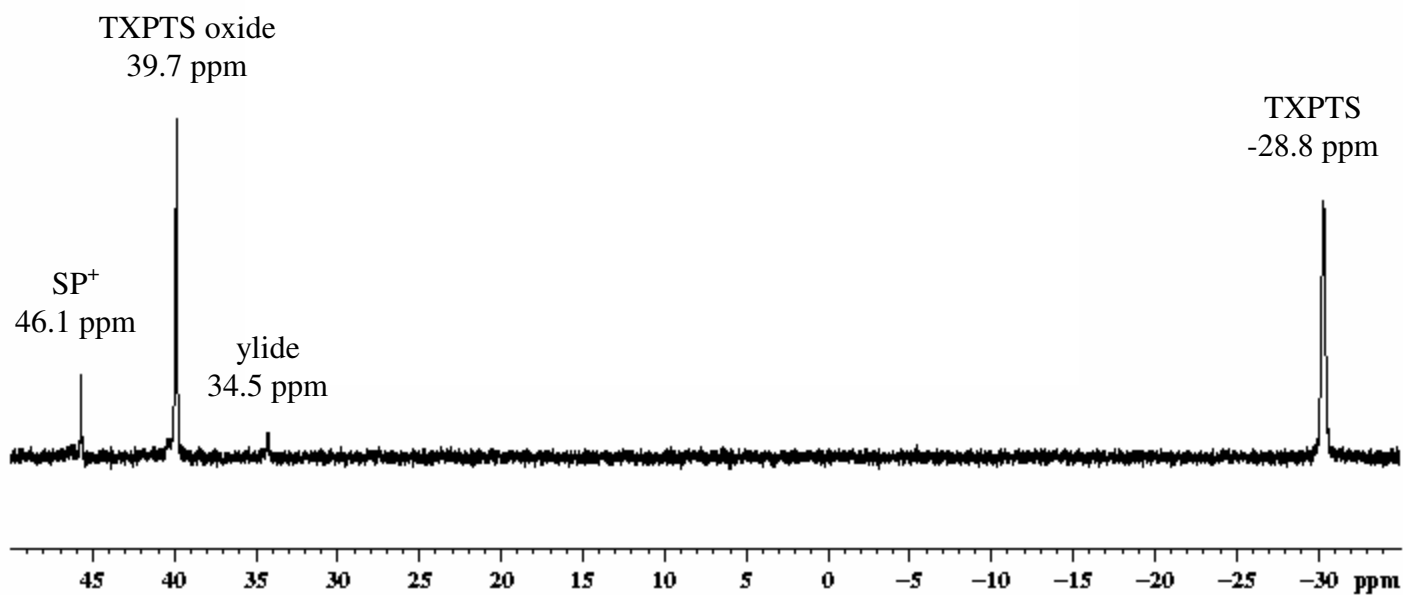

B.

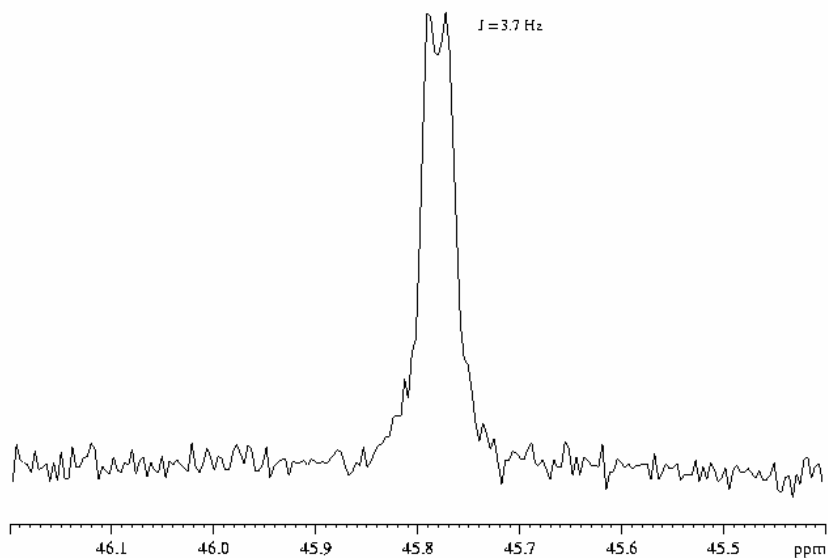

**Figure S1**  $^{31}\text{P}$  NMR for the ( $^{13}\text{C}$ )-Cys-SNO/TXPTS reaction mixture. a)  $^{31}\text{P}$  NMR in HEPES buffer with 10%  $\text{D}_2\text{O}$ . b) 203 MHz field  $^{31}\text{P}$  NMR zoomed in showing **6** from the reaction mixture ( $^2J_{\text{P-C}} = 3.7 \text{ Hz}$ ).

2.  $^{13}\text{C}$  NMR of the ( $^{13}\text{C}$ )-Cys-SNO and TXPTS reaction

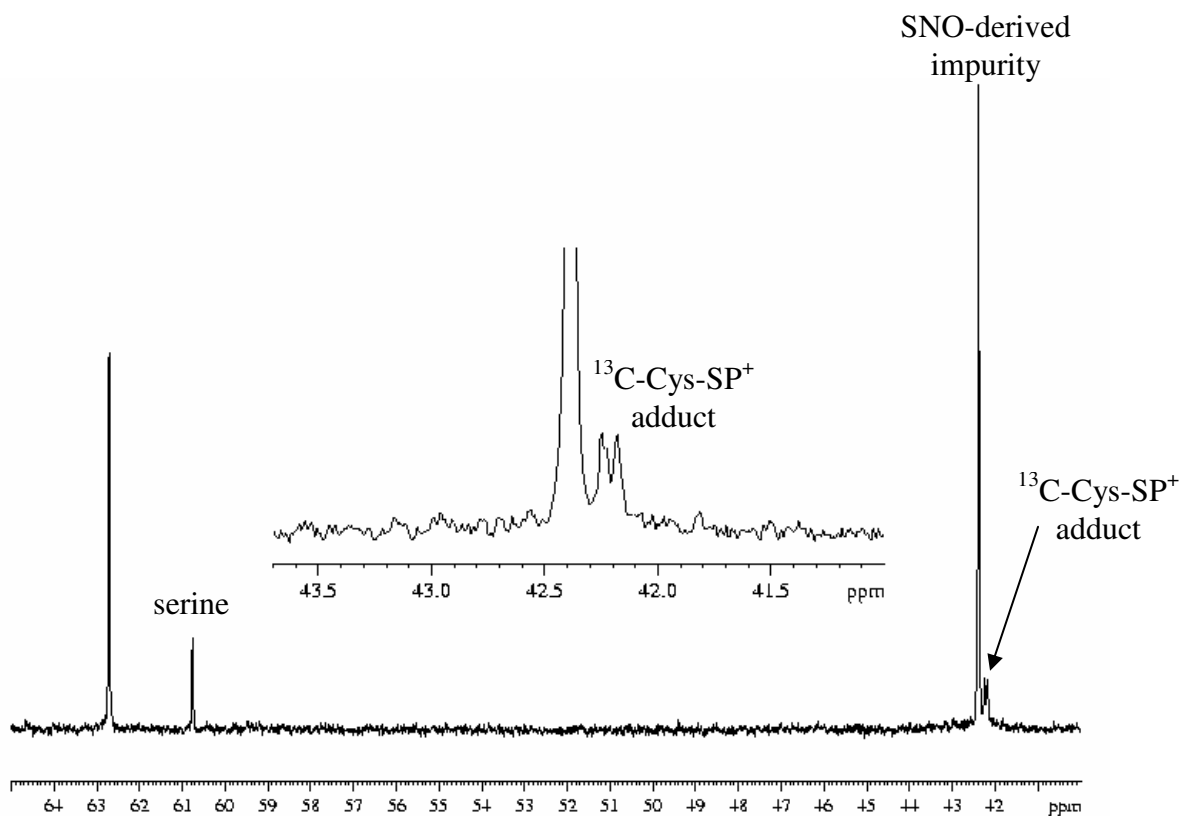

**Figure S2.**  $^{13}\text{C}$  NMR for the ( $^{13}\text{C}$ )-Cys-SNO/TXPTS reaction mixture. The peak at 42.2 ppm corresponds to **6** with a weak  $^2J$  coupling of 8.6 Hz. The peak at 42.4 ppm emerges during the Cys-SNO preparation, 60.8 ppm corresponds to the serine  $\text{CH}_2$ , and the 62.7 ppm peak is currently unknown.

### 3. LC-MS of the Cys-SNO and TXPTS reaction

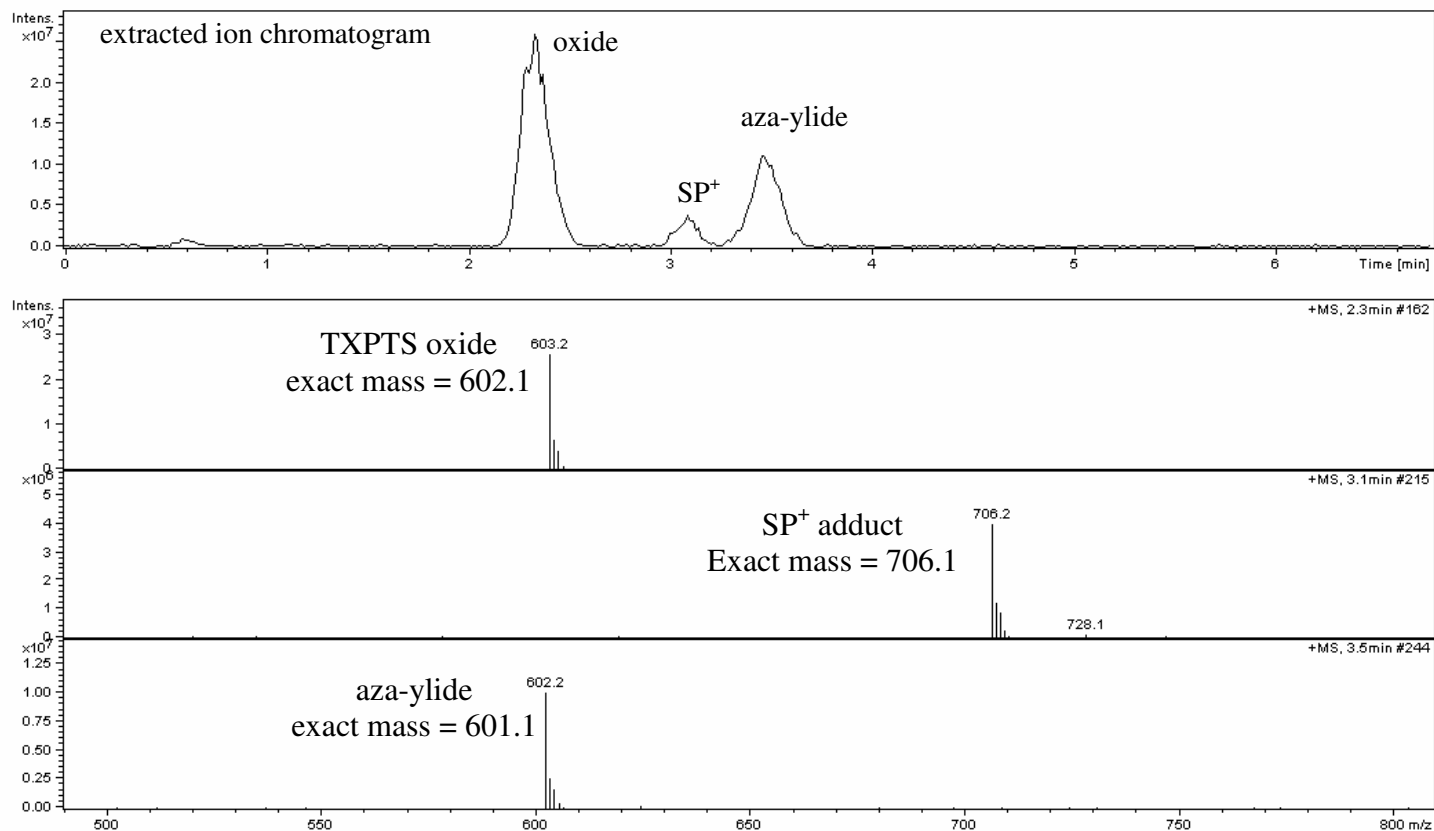

**Figure S3.** LC-MS for the ( $^{12}\text{C}$ )-Cys-SNO + TXPTS reaction

#### 4. LC-MS of the ( $^{13}\text{C}$ )-Cys-SNO and TXPTS reaction

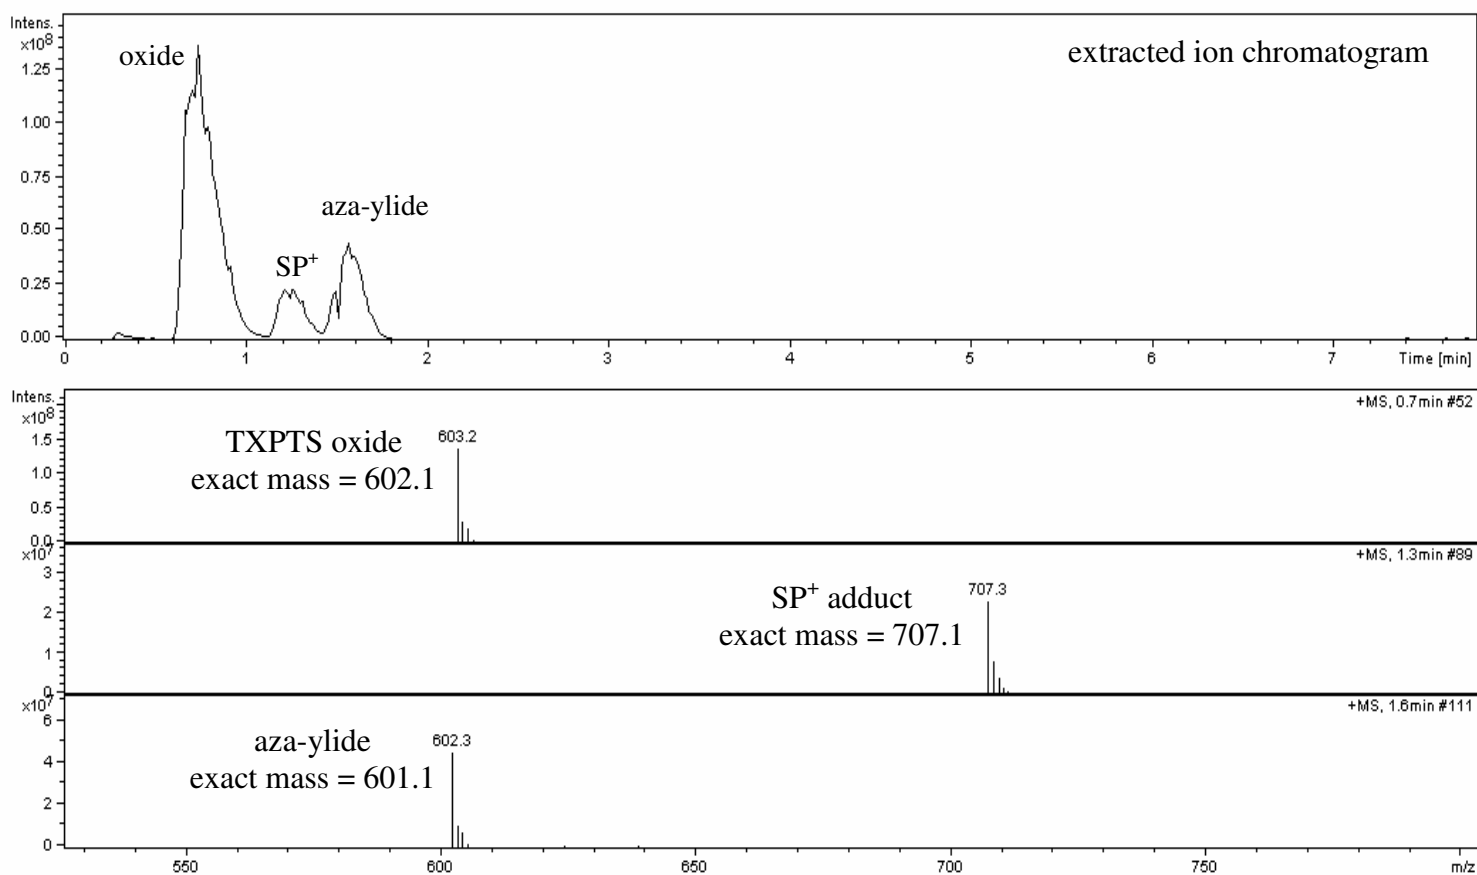

**Figure S4.** LC-MS for the ( $^{13}\text{C}$ )-Cys-SNO + TXPTS

## 5. LC-MS of the GSNO and TXPTS reaction

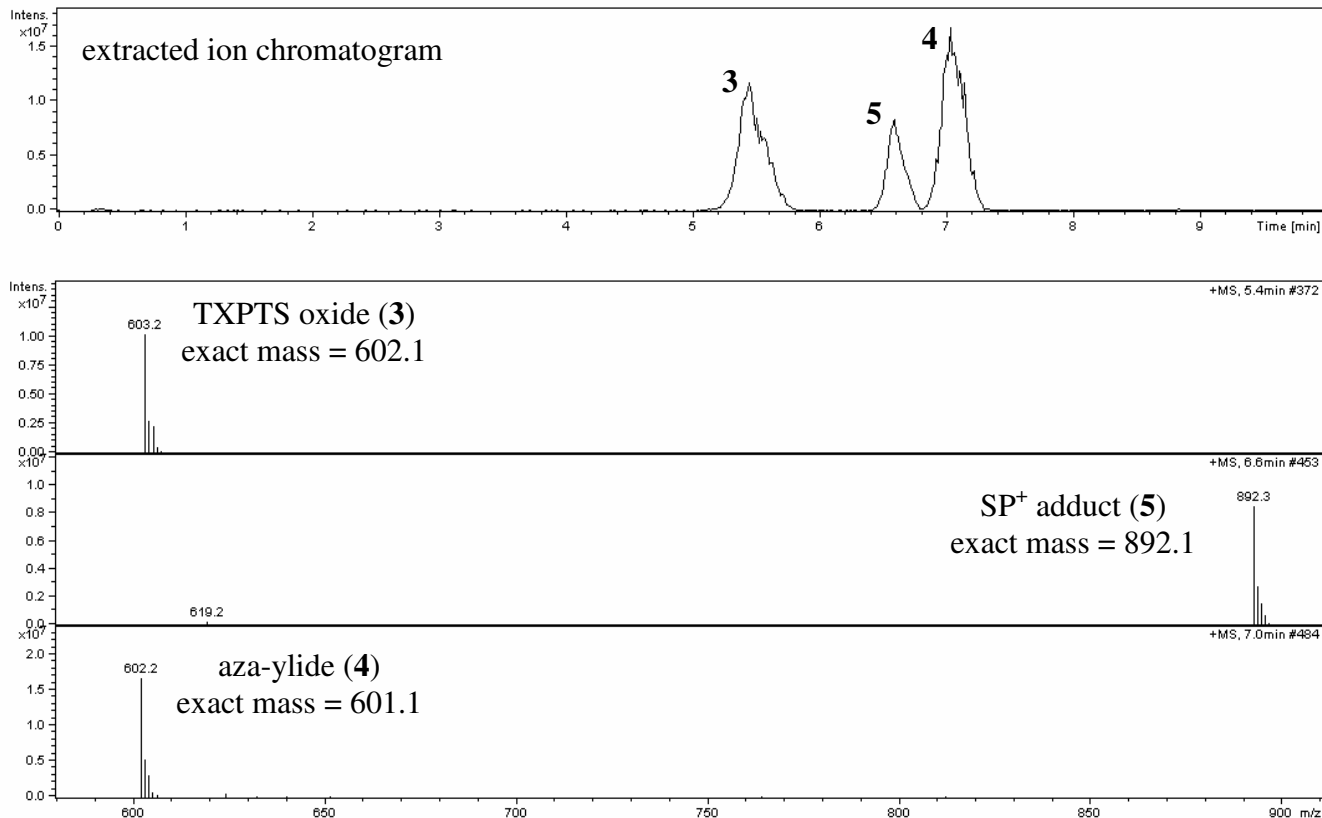

**Figure S5.** LC-MS analysis of the reaction between GSNO and TXPTS. LC retention times and observed masses are as follows: TXPTS oxide (**3**) = 5.4 min ( $M + 1$ )  $m/z = 603.2$ ; SP<sup>+</sup> adduct (**5**) = 6.5 min ( $M^+$ )  $m/z = 892.3$ ; aza-ylide (**4**) = 7.1 min ( $M + 1$ )  $m/z = 602.2$ . All observed  $m/z$  are in agreement with the reported exact masses for each compound.

## 6. LC-MS of the $^{15}\text{N}$ -GSNO/TXPTS reaction

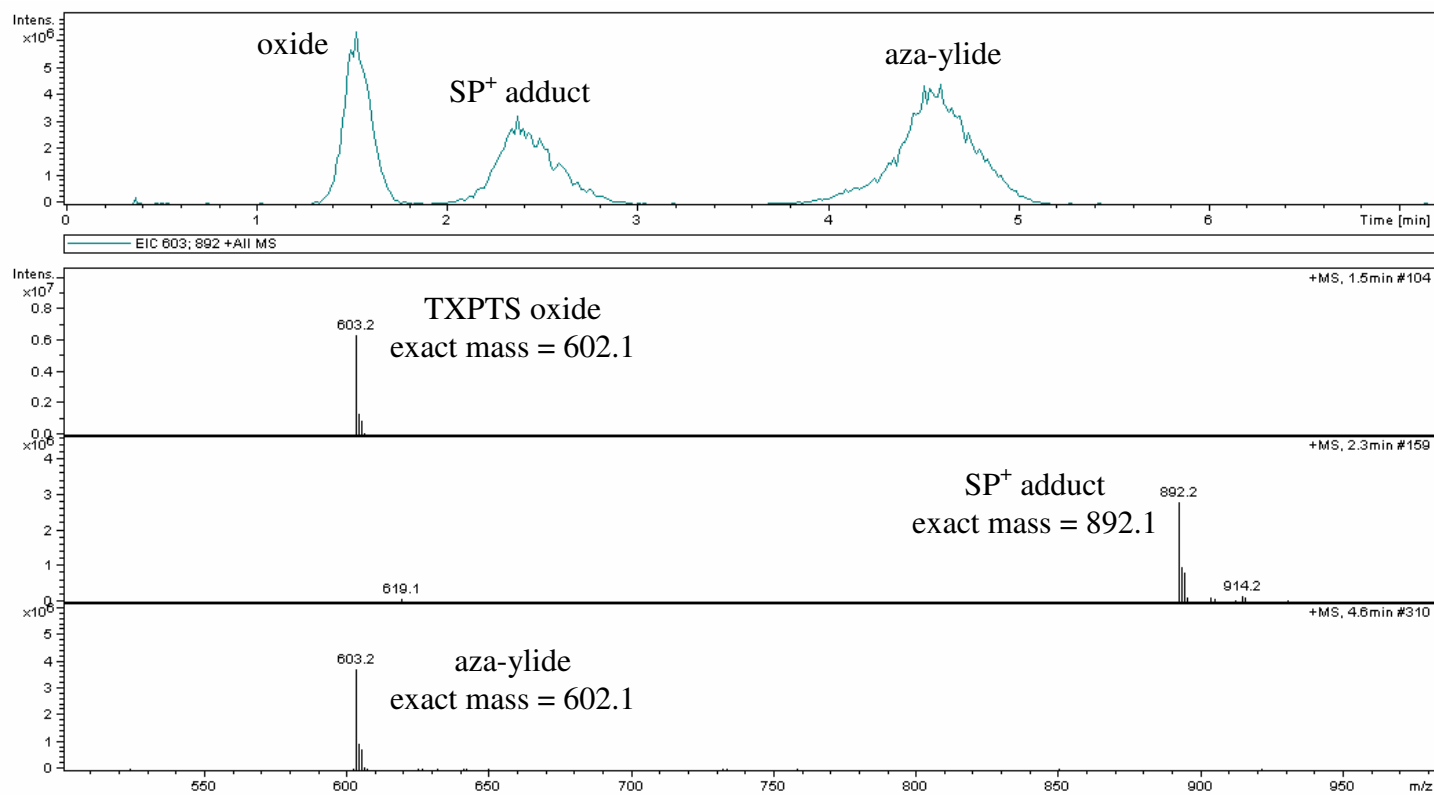

**Figure S6.** LC-MS for the  $^{15}\text{N}$ -GSNO/TXPTS reaction.

## 7. $^{31}\text{P}$ NMR of the GSH and TXPTS reaction

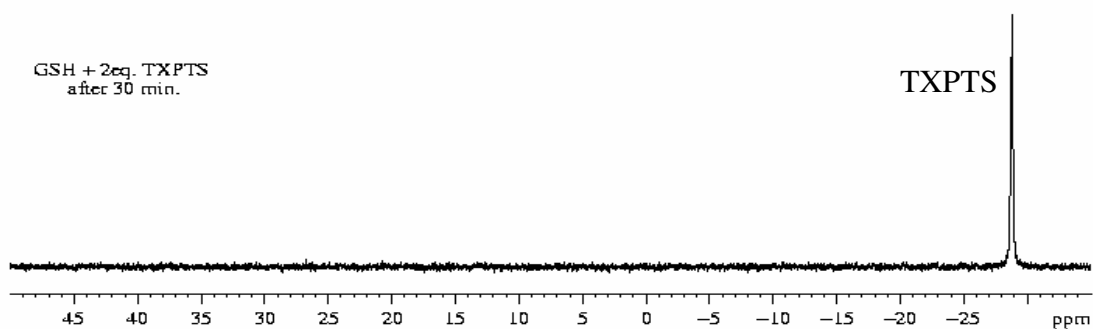

**Figure S7.**  $^{31}\text{P}$  NMR of the reaction between GSH (20 mM) and TXPTS (40 mM) in Tris buffer (200 mM, pH 7). After 30 min. there is no sign of reaction.

## 8. $^{31}\text{P}$ NMR of the GSSG and TXPTS reaction

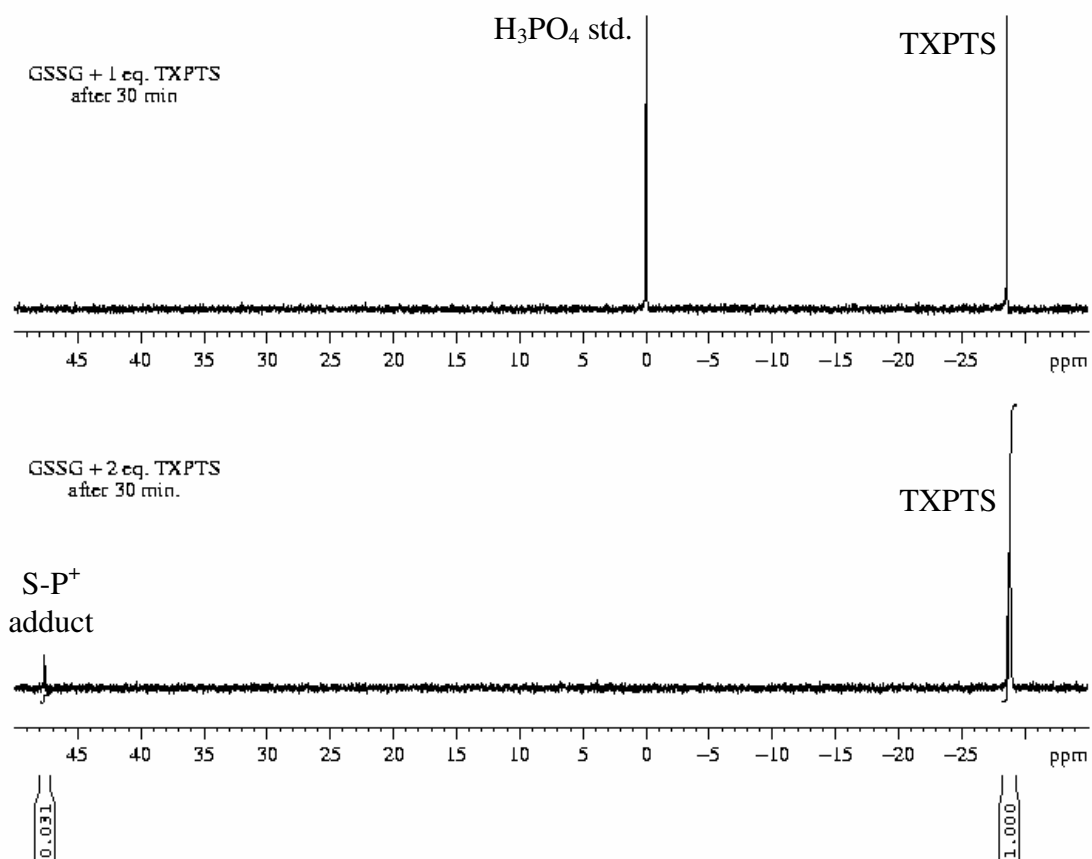

**Figure S8.**  $^{31}\text{P}$  NMR of the reaction between GSSG (20 mM) and TXPTS. (top) with 20 mM TXPTS (bottom) with 40 mM TXPTS (2 eq.) roughly 3% reacts to form **5**. Both spectra were taken after 30 min.



## 9. $^{31}\text{P}$ NMR showing the treatment of the GSNO/TXPTS mixture with DTT

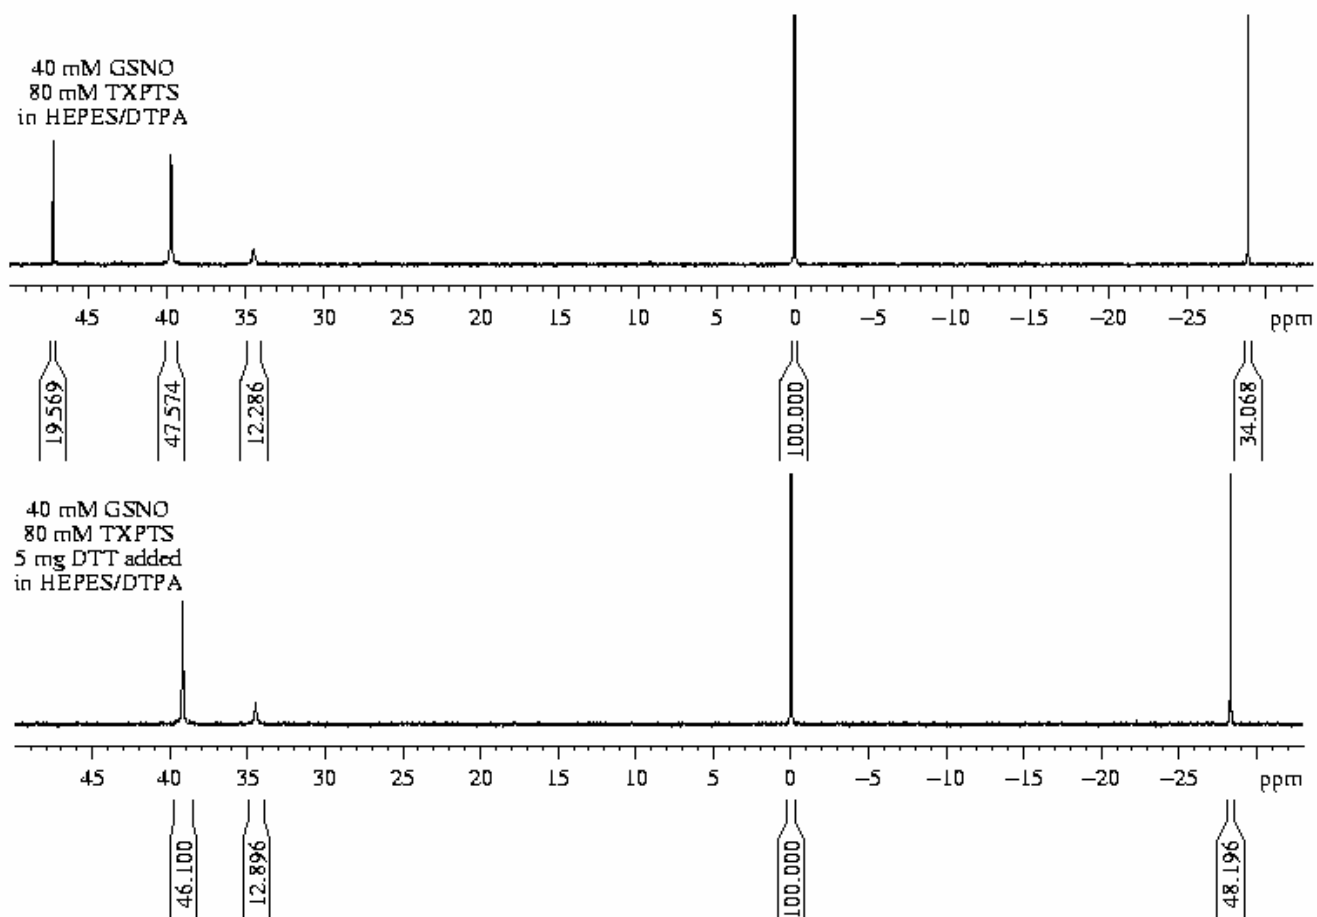

**Figure S9.** (Top)  $^{31}\text{P}$  NMR of the GSNO/TXPTS reaction mixture showing TXPTS (-28.8 ppm), ylide (34.5 ppm), oxide (39.7 ppm), S-P<sup>+</sup> adduct (47.2 ppm), and the external H<sub>3</sub>PO<sub>4</sub> standard (0 ppm). (Bottom) The addition of DTT to this mixture completely reduces the S-P<sup>+</sup> adduct, regenerating TXPTS starting material as seen by the changes in integration.

10. UV/vis of GSNO (16 mM) with TXPTS (32 mM)

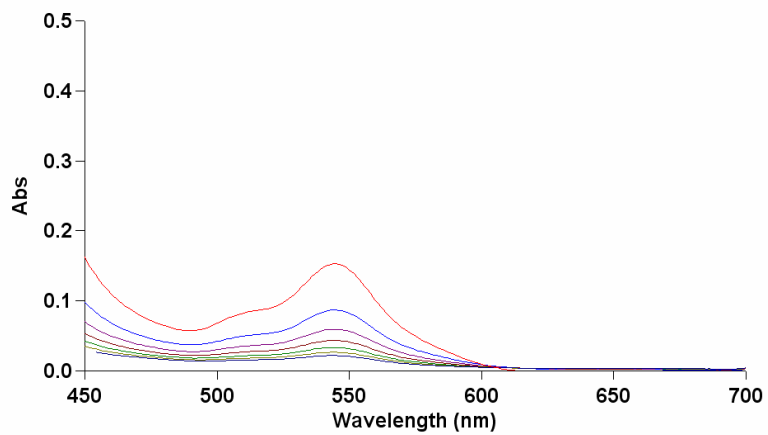

**Figure S10.** UV/Vis of GSNO (16 mM) with TXPTS (32 mM) at 545 nm with 1 scan taken every 30 sec.

11.  $^{31}\text{P}$  NMR of the reaction between cysteine and cystine with TXPTS

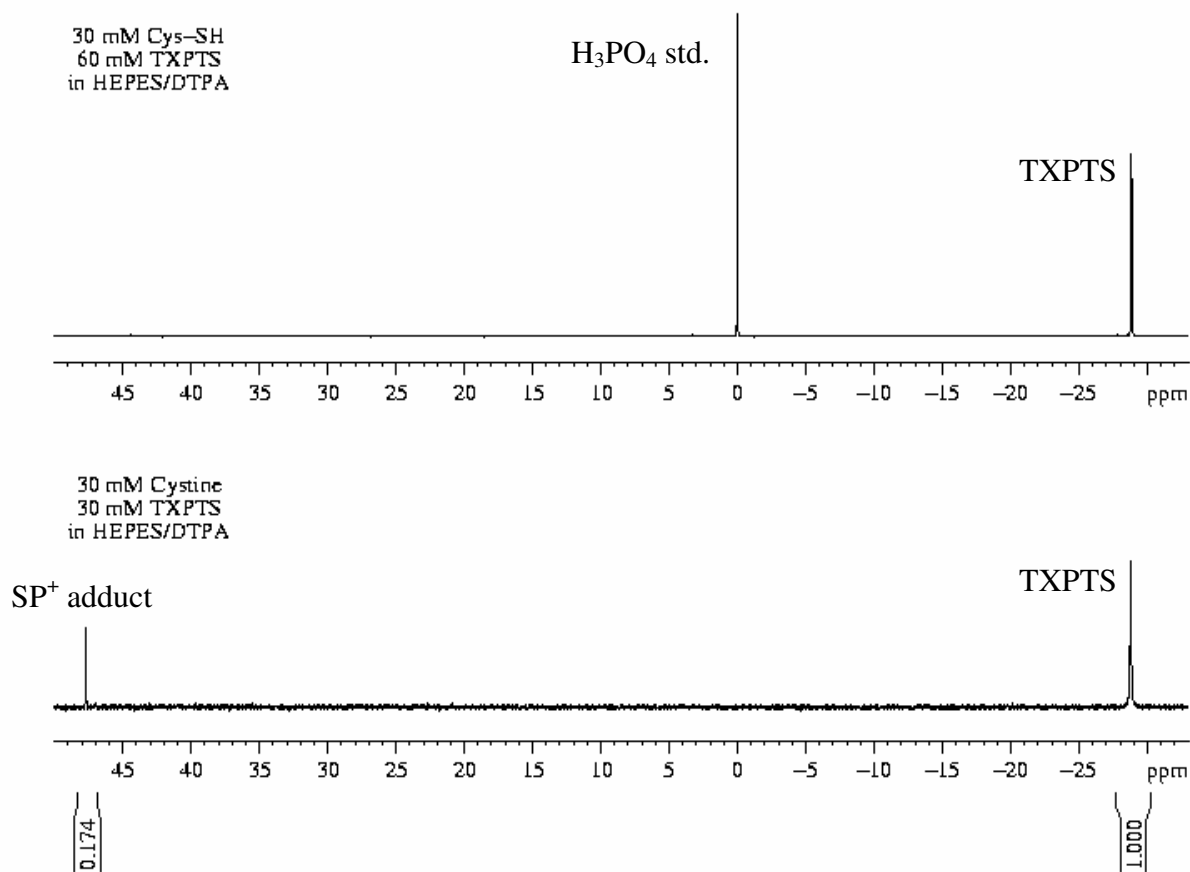

**Figure S11. (Top)**  $^{31}\text{P}$  NMR of a reaction mixture containing Cys-SH (30 mM) and TXPTS (60 mM) in HEPES buffer (100 mM). Only TXPTS (-28.8 ppm) and the external H<sub>3</sub>PO<sub>4</sub> standard (0 ppm) are observed. **(Bottom)**  $^{31}\text{P}$  NMR of a reaction mixture containing Cys-S-S-Cys (30 mM) and TXPTS (30 mM) in HEPES buffer (100 mM). Based on integration, roughly 15% of the TXPTS reacts to form the SP<sup>+</sup> adduct (46 ppm).

12.  $^{31}\text{P}$  NMR showing the treatment of the Cys-SNO/TXPTS reaction with DTT

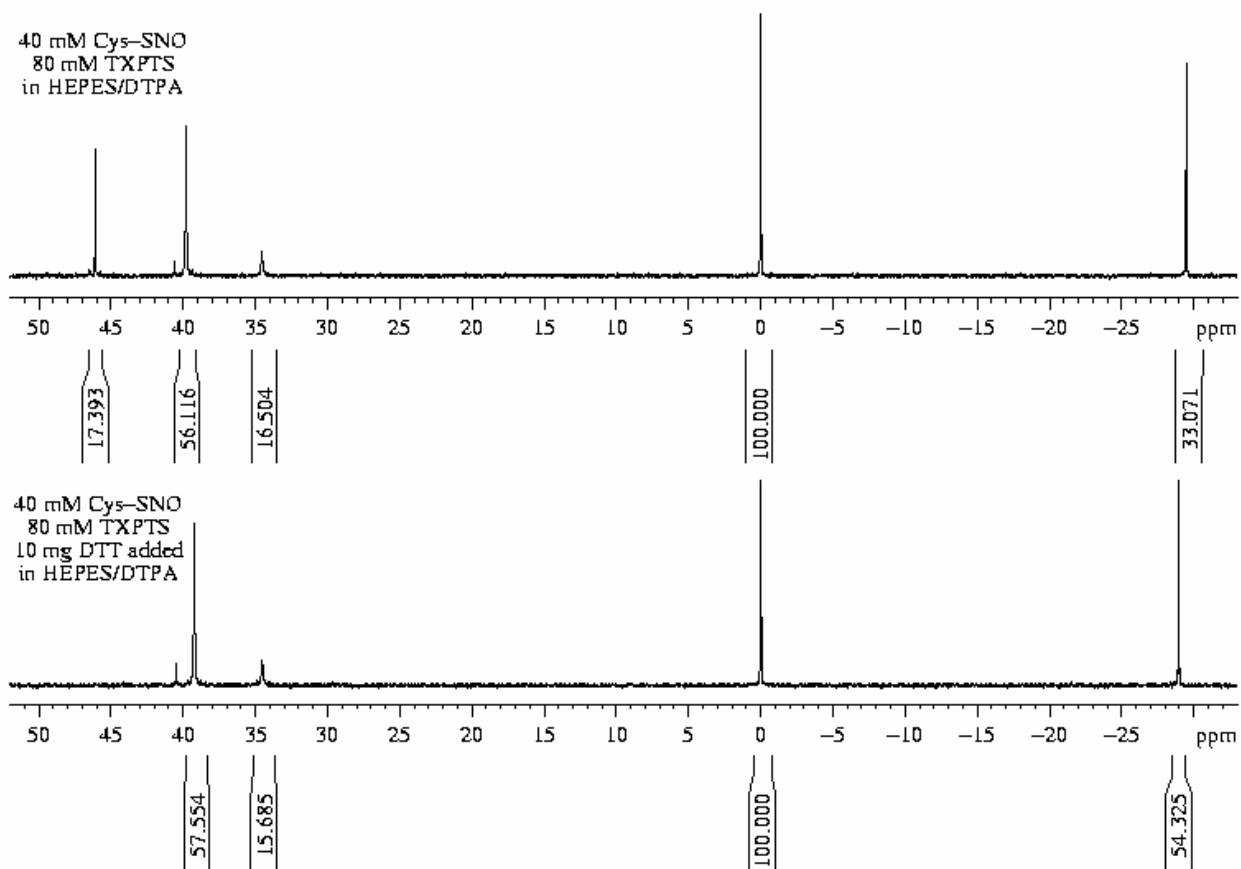

**Figure S12. (Top)**  $^{31}\text{P}$  NMR of Cys-SNO/TXPTS reaction mixture showing TXPTS (-28.8 ppm), ylide (34.5 ppm), oxide (39.7 ppm), S-P<sup>+</sup> adduct (46.1 ppm), and the external H<sub>3</sub>PO<sub>4</sub> standard (0 ppm). **(Bottom)** The addition of DTT to this mixture completely reduces the S-P<sup>+</sup> adduct and regenerates TXPTS starting material as seen by the changes in integration.

### 13. ESI-TOF MS of the reaction between AhpC-SH with TXPTS

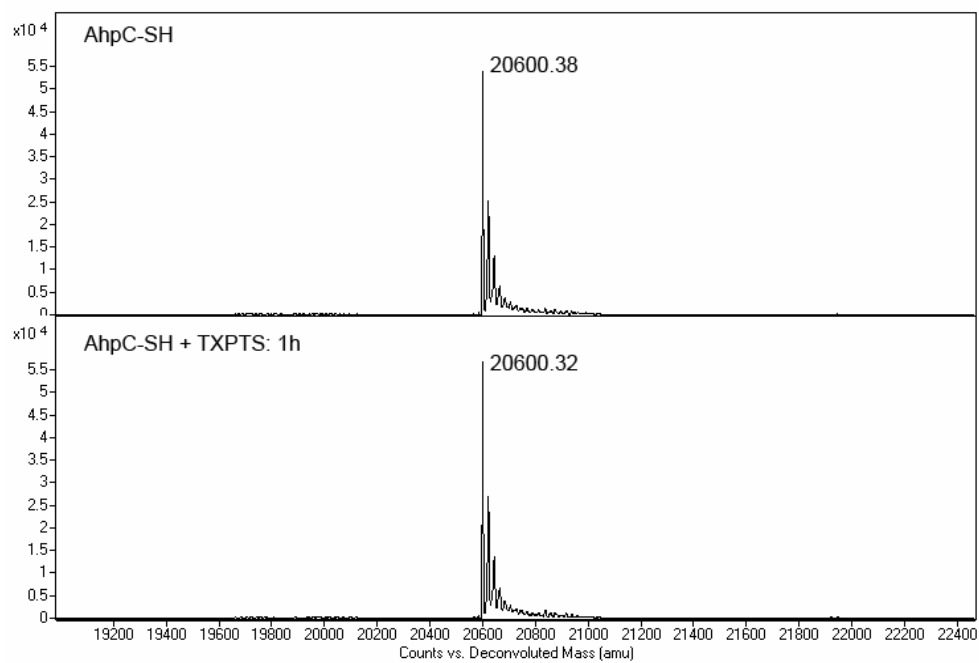

**Figure S13.** ESI-TOF MS data for AhpC-SH + TXPTS over 1h. TXPTS shows no affinity for the free thiol (Cys 46) of C165S AhpC.

14. ESI-TOF MS of labeled AhpC-S-P<sup>+</sup> in normal and denaturing conditions

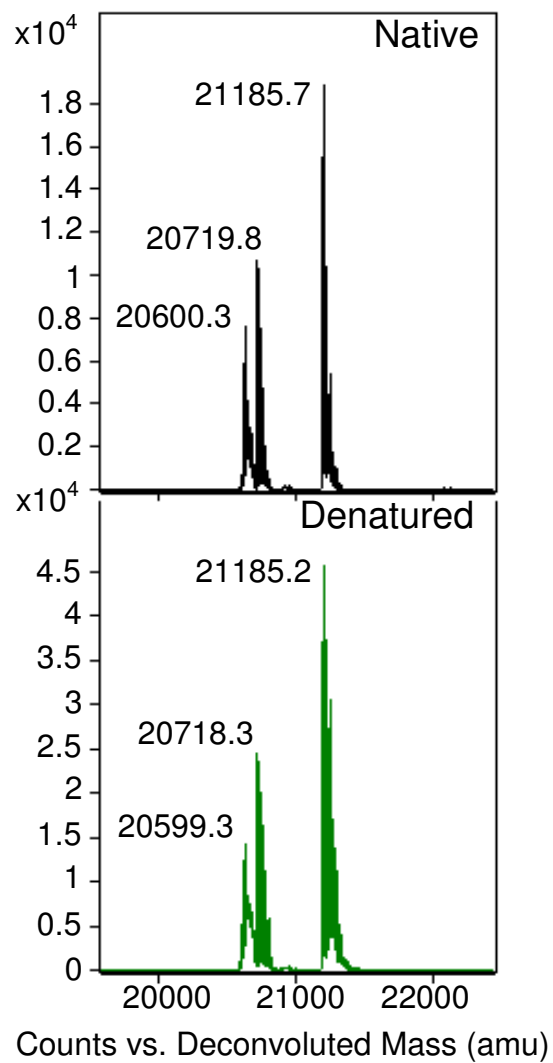

**Figure S14.** Comparison of SNO-labeled AhpC under normal and denaturing (40% acetonitrile) conditions

## 15. $^{31}\text{P}$ NMR of **1**

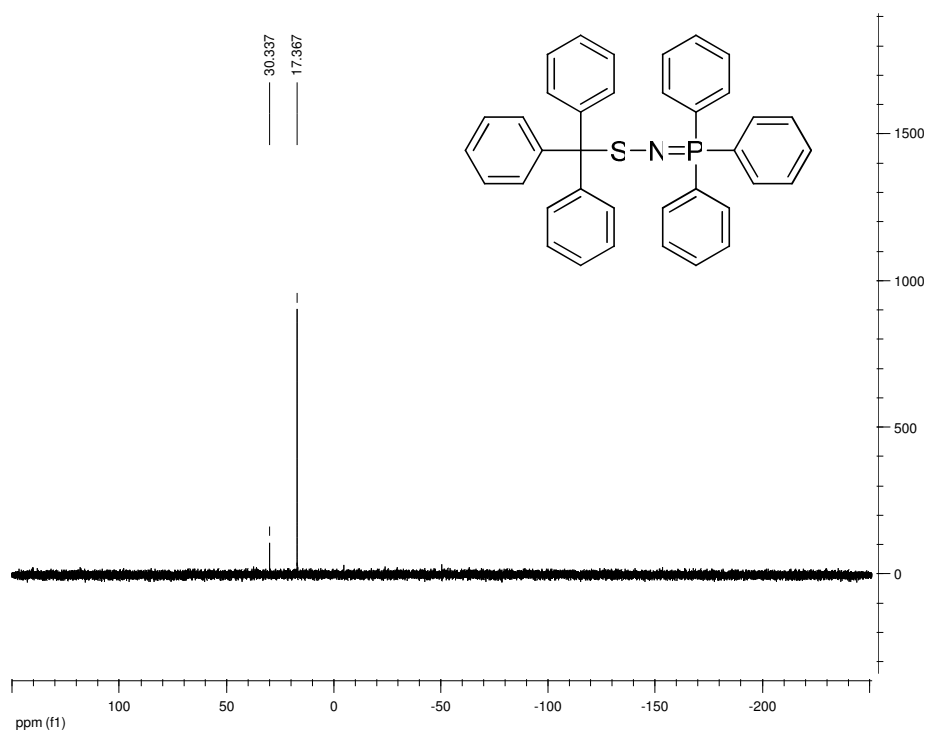

**Figure S15.**  $^{31}\text{P}$  NMR of **1** in  $\text{CDCl}_3$ . The product appears at 17.3 ppm and trace triphenylphosphine oxide (by-product of the reaction) at 30.3 ppm.

# CRYSTAL STRUCTURE ANALYSIS REPORT and TABLES for 1

## Brief Experimental Description to be Included as Text or as a Footnote at Time of Publication

Colorless crystals of  $C_{37}H_{30}NPS - 0.5 C_7H_8$  are, at 193(2) K, monoclinic, space group  $P2_1/c - C_{2h}^5$  (No. 14) with  $a = 17.631(2) \text{ \AA}$ ,  $b = 10.525(1) \text{ \AA}$ ,  $c = 17.177(2) \text{ \AA}$ ,  $\beta = 101.859(2)^\circ$ ,  $V = 3119.5(7) \text{ \AA}^3$ , and  $Z = 4$   $\{d_{\text{calcd}} = 1.273 \text{ gcm}^{-3}$ ;  $\mu_a(\text{MoK}\bar{\alpha}) = 0.186 \text{ mm}^{-1}\}$ . A full hemisphere of diffracted intensities (1868 30-second frames with an  $\omega$  scan width of  $0.30^\circ$ ) was measured for a single-domain specimen using graphite-monochromated  $\text{MoK}\bar{\alpha}$  radiation ( $\lambda = 0.71073 \text{ \AA}$ ) on a Bruker SMART APEX CCD Single Crystal Diffraction System. X-rays were provided by a fine-focus sealed x-ray tube operated at 50kV and 30mA.

Lattice constants were determined with the Bruker SAINT software package using peak centers for 3979 reflections having  $7.72^\circ \leq 2\theta \leq 52.08^\circ$ . A total of 25048 integrated reflection intensities having  $2\theta(\text{MoK}\bar{\alpha}) \leq 53.00^\circ$  were produced using the Bruker program SAINT; 6427 of these were unique and gave  $R_{\text{int}} = 0.054$  with a coverage which was 99.4% complete. The data were corrected for scaling and variable absorption effects using SADABS; the ratio of minimum and maximum transmission values was 0.81618.

The Bruker software package SHELXTL was used to solve the structure using "direct methods" techniques. All stages of weighted full-matrix least-squares refinement were conducted using  $F_o^2$  data with the SHELXTL Version 6.14 software package. The resulting structural parameters have been refined to convergence  $\{R_1$  (unweighted, based on  $F$ ) = 0.0591 for 5070 independent reflections having  $2\theta(\text{MoK}\bar{\alpha}) < 53.00^\circ$  and  $F^2 > 2\sigma(F^2)\}$   $\{R_1$  (unweighted, based on  $F$ ) = 0.0761 and  $wR_2$  (weighted, based on  $F^2$ ) = 0.1476 for all 6427 reflections} using counter-weighted full-matrix least-squares techniques and a structural model which incorporated anisotropic thermal parameters for all nonhydrogen atoms. The toluene solvent molecule of crystallization lies on a crystallographic inversion center at  $1/2, 1/2, 0$  in the unit cell and is therefore disordered with two orientations in the crystal. Restraints were imposed on the positional and displacement parameters of the seven (half-occupancy) carbon atoms. The hydrogen atoms were included in the structure factor calculations as idealized atoms (assuming  $sp^2$ - hybridization of the carbon atoms and C-H bond lengths of  $0.95 \text{ \AA}$ ) "riding" on their respective carbon atoms. The isotropic



thermal parameters of the hydrogen atoms were fixed at values 1.2(non-methyl) times the equivalent isotropic thermal parameters of the carbon atoms to which they are covalently bonded. Hydrogen atoms on the methyl group of the disordered toluene molecule were not included in the structural model. A total of 409 parameters were refined using 61 restraints and 6427 data. The largest shift/s.u. was 0.000 in the final refinement cycle. The final difference map had maxima and minima of 0.482 and -0.585 e<sup>-</sup>/Å<sup>3</sup>, respectively.

### **Acknowledgment**

The authors thank the National Science Foundation (grant CHE-0234489) for funds to purchase the x-ray instrument and computers.

### **References**

- (1) International Tables for Crystallography, Vol A, 4<sup>th</sup> ed., Kluwer Academic Publishers: Boston (1996).
- (2) Data Collection: SMART (Version 5.628) (2002). Bruker-AXS, 5465 E. Cheryl Parkway, Madison, WI 53711-5373 USA.
- (3) Data Reduction: SAINT (Version 6.36) (2003). Bruker-AXS, 5465 E. Cheryl Parkway, Madison, WI 53711-5373, USA.
- (4) G. M. Sheldrick, (2006). SADABS, Version 2006/3. Bruker-AXS, 5465 E. Cheryl Parkway, Madison, WI 53711-5373 USA.
- (5) G. M. Sheldrick (2001). SHELXTL (Version 6.14). Bruker-AXS, 5465 E. Cheryl Parkway, Madison, WI 53711-5373 USA.

Table 1. Crystal data and structure refinement for C<sub>37</sub>H<sub>30</sub>NPS – 0.5 C<sub>7</sub>H<sub>8</sub>

|                                       |                                                                          |
|---------------------------------------|--------------------------------------------------------------------------|
| Identification code                   | a13m                                                                     |
| Empirical formula                     | C40.50 H34 N P S                                                         |
| Formula weight                        | 597.72                                                                   |
| Temperature                           | 193(2) K                                                                 |
| Wavelength                            | 0.71073 Å                                                                |
| Crystal system                        | Monoclinic                                                               |
| Space group                           | P2(1)/c – C <sub>2h</sub> <sup>5</sup> (No. 14)                          |
| Unit cell dimensions                  | a = 17.631(2) Å<br>b = 10.5248(13) Å, β = 101.859(2)°<br>c = 17.177(2) Å |
| Volume                                | 3119.5(7) Å <sup>3</sup>                                                 |
| Z                                     | 4                                                                        |
| Density (calculated)                  | 1.273 g/cm <sup>3</sup>                                                  |
| Absorption coefficient                | 0.186 mm <sup>-1</sup>                                                   |
| F(000)                                | 1260                                                                     |
| Crystal size                          | 0.32 x 0.08 x 0.04 mm <sup>3</sup>                                       |
| Theta range for data collection       | 3.86 to 26.50°                                                           |
| Index ranges                          | -22 ≤ h ≤ 22, -13 ≤ k ≤ 13, -21 ≤ l ≤ 21                                 |
| Reflections collected                 | 25048                                                                    |
| Independent reflections               | 6427 [R(int) = 0.0539]                                                   |
| Completeness to theta = 26.50°        | 99.4 %                                                                   |
| Absorption correction                 | Multi-scan (SADABS)                                                      |
| Ratio of Min./Max. transmission       | 0.8162                                                                   |
| Refinement method                     | Full-matrix least-squares on F <sup>2</sup>                              |
| Data / restraints / parameters        | 6427 / 61 / 409                                                          |
| Goodness-of-fit on F <sup>2</sup>     | 1.114                                                                    |
| Final R indices [5070 I > 2σ(I) data] | R <sub>1</sub> = 0.0591, wR <sub>2</sub> = 0.1386                        |
| R indices (all data)                  | R <sub>1</sub> = 0.0761, wR <sub>2</sub> = 0.1476                        |
| Largest diff. peak and hole           | 0.482 and -0.585 -/Å <sup>3</sup>                                        |

---


$$R_1 = \frac{\sum ||F_O| - |F_C||}{\sum |F_O|}$$

$$wR_2 = \left\{ \frac{\sum [w(F_O^2 - F_C^2)]}{\sum [w(F_O^2)]} \right\}^{1/2}$$

Table 2. Atomic coordinates ( $\times 10^4$ ) and equivalent isotropic displacement parameters ( $\text{\AA}^2 \times 10^3$ ) for  $\text{C}_{37}\text{H}_{30}\text{NPS} - 0.5 \text{C}_7\text{H}_8$ .  $U(\text{eq})$  is defined as one third of the trace of the orthogonalized  $U_{ij}$  tensor.

|       | x       | y        | z       | U(eq) |
|-------|---------|----------|---------|-------|
| S(1)  | 2531(1) | 3970(1)  | 1802(1) | 25(1) |
| P(1)  | 3438(1) | 1916(1)  | 1357(1) | 25(1) |
| N(1)  | 3092(1) | 3312(2)  | 1231(1) | 30(1) |
| C(1)  | 1619(1) | 4444(2)  | 1099(1) | 22(1) |
| C(1A) | 1084(1) | 4768(2)  | 1671(1) | 25(1) |
| C(2A) | 1320(2) | 5700(2)  | 2254(2) | 32(1) |
| C(3A) | 841(2)  | 6079(3)  | 2752(2) | 41(1) |
| C(4A) | 114(2)  | 5541(3)  | 2680(2) | 44(1) |
| C(5A) | -121(2) | 4619(3)  | 2120(2) | 45(1) |
| C(6A) | 359(1)  | 4231(2)  | 1618(2) | 35(1) |
| C(1B) | 1319(1) | 3336(2)  | 545(1)  | 24(1) |
| C(2B) | 1082(1) | 3477(2)  | -270(1) | 31(1) |
| C(3B) | 799(2)  | 2453(3)  | -756(2) | 38(1) |
| C(4B) | 748(2)  | 1272(3)  | -428(2) | 40(1) |
| C(5B) | 980(2)  | 1108(2)  | 383(2)  | 36(1) |
| C(6B) | 1265(1) | 2126(2)  | 865(2)  | 29(1) |
| C(1C) | 1736(1) | 5646(2)  | 627(1)  | 24(1) |
| C(2C) | 1123(2) | 6478(2)  | 378(2)  | 33(1) |
| C(3C) | 1216(2) | 7560(2)  | -56(2)  | 39(1) |
| C(4C) | 1915(2) | 7828(3)  | -248(2) | 43(1) |
| C(5C) | 2525(2) | 7003(3)  | -13(2)  | 45(1) |
| C(6C) | 2442(2) | 5917(2)  | 422(2)  | 36(1) |
| C(1D) | 2979(1) | 815(2)   | 1923(2) | 28(1) |
| C(2D) | 2601(2) | -260(2)  | 1580(2) | 39(1) |
| C(3D) | 2221(2) | -1057(3) | 2014(2) | 52(1) |
| C(4D) | 2221(2) | -784(3)  | 2794(2) | 54(1) |
| C(5D) | 2586(2) | 297(3)   | 3142(2) | 50(1) |
| C(6D) | 2968(2) | 1101(3)  | 2710(2) | 37(1) |
| C(1E) | 4457(1) | 1907(2)  | 1832(1) | 29(1) |
| C(2E) | 4793(2) | 921(3)   | 2311(2) | 48(1) |

|       |         |         |          |       |
|-------|---------|---------|----------|-------|
| C(3E) | 5583(2) | 927(3)  | 2637(2)  | 54(1) |
| C(4E) | 6036(2) | 1922(3) | 2487(2)  | 48(1) |
| C(5E) | 5718(2) | 2861(3) | 1970(2)  | 51(1) |
| C(6E) | 4928(2) | 2861(3) | 1643(2)  | 41(1) |
| C(1F) | 3403(1) | 1208(2) | 392(1)   | 29(1) |
| C(2F) | 2825(2) | 1601(3) | -239(2)  | 34(1) |
| C(3F) | 2763(2) | 1055(3) | -984(2)  | 41(1) |
| C(4F) | 3274(2) | 127(3)  | -1100(2) | 44(1) |
| C(5F) | 3846(2) | -276(3) | -477(2)  | 48(1) |
| C(6F) | 3914(2) | 250(3)  | 268(2)   | 41(1) |

Disordered Toluene of Crystallization<sup>d</sup>

|       |         |          |         |        |
|-------|---------|----------|---------|--------|
| C(1G) | 4903(4) | 4180(8)  | -257(4) | 114(3) |
| C(2G) | 4366(4) | 4975(8)  | -36(4)  | 121(4) |
| C(3G) | 4563(5) | 6110(9)  | 358(5)  | 142(4) |
| C(4G) | 5315(6) | 6465(9)  | 556(5)  | 138(4) |
| C(5G) | 5884(5) | 5682(11) | 335(6)  | 144(4) |
| C(6G) | 5688(4) | 4568(10) | -58(6)  | 155(5) |
| C(7G) | 4677(5) | 2973(8)  | -681(5) | 137(5) |

<sup>a</sup> The numbers in parentheses are the estimated standard deviations in the last significant digit.

<sup>b</sup> Atoms are labeled in agreement with Figures 1 - 4.

<sup>c</sup>  $U(eq)$  is defined as one third of the trace of the orthogonalized  $U^{ij}$  tensor.

<sup>d</sup> The toluene solvent molecule of crystallization lies on a crystallographic inversion center at  $\frac{1}{2}, \frac{1}{2}, 0$  in the unit cell and is therefore disordered with two orientations in the crystal. Restraints were imposed on the positional and displacement parameters of the seven (half-occupancy) carbon atoms.

Table 3. Bond lengths [ $\text{\AA}$ ] and angles [ $^\circ$ ] for  $\text{C}_{37}\text{H}_{30}\text{NPS} - 0.5 \text{C}_7\text{H}_8$ 

|                 |            |                 |            |
|-----------------|------------|-----------------|------------|
| S(1)-N(1)       | 1.679(2)   | S(1)-C(1)       | 1.870(2)   |
| P(1)-N(1)       | 1.589(2)   |                 |            |
| P(1)-C(1D)      | 1.807(2)   | C(1)-C(1B)      | 1.530(3)   |
| P(1)-C(1F)      | 1.806(2)   | C(1)-C(1A)      | 1.533(3)   |
| P(1)-C(1E)      | 1.813(2)   | C(1)-C(1C)      | 1.539(3)   |
| C(1A)-C(6A)     | 1.384(3)   | C(4D)-C(5D)     | 1.382(5)   |
| C(1A)-C(2A)     | 1.402(3)   | C(5D)-C(6D)     | 1.388(4)   |
| C(2A)-C(3A)     | 1.379(4)   | C(1E)-C(2E)     | 1.380(4)   |
| C(3A)-C(4A)     | 1.384(4)   | C(1E)-C(6E)     | 1.384(4)   |
| C(4A)-C(5A)     | 1.370(4)   | C(2E)-C(3E)     | 1.390(4)   |
| C(5A)-C(6A)     | 1.387(4)   | C(3E)-C(4E)     | 1.373(4)   |
| C(1B)-C(2B)     | 1.384(3)   | C(4E)-C(5E)     | 1.370(4)   |
| C(1B)-C(6B)     | 1.398(3)   | C(5E)-C(6E)     | 1.391(4)   |
| C(2B)-C(3B)     | 1.392(3)   | C(1F)-C(2F)     | 1.390(3)   |
| C(3B)-C(4B)     | 1.376(4)   | C(1F)-C(6F)     | 1.397(3)   |
| C(4B)-C(5B)     | 1.379(4)   | C(2F)-C(3F)     | 1.386(4)   |
| C(5B)-C(6B)     | 1.384(3)   | C(3F)-C(4F)     | 1.371(4)   |
| C(1C)-C(2C)     | 1.389(3)   | C(4F)-C(5F)     | 1.379(4)   |
| C(1C)-C(6C)     | 1.391(3)   | C(5F)-C(6F)     | 1.378(4)   |
| C(2C)-C(3C)     | 1.390(4)   | C(1G)-C(2G)     | 1.3739     |
| C(3C)-C(4C)     | 1.368(4)   | C(1G)-C(6G)     | 1.4165     |
| C(4C)-C(5C)     | 1.378(4)   | C(1G)-C(7G)     | 1.4769     |
| C(5C)-C(6C)     | 1.390(4)   | C(2G)-C(3G)     | 1.3812     |
| C(1D)-C(2D)     | 1.382(4)   | C(3G)-C(4G)     | 1.3519     |
| C(1D)-C(6D)     | 1.389(4)   | C(4G)-C(5G)     | 1.4084     |
| C(2D)-C(3D)     | 1.384(4)   | C(5G)-C(6G)     | 1.3625     |
| C(3D)-C(4D)     | 1.370(5)   |                 |            |
| N(1)-S(1)-C(1)  | 105.34(10) | P(1)-N(1)-S(1)  | 123.91(12) |
| N(1)-P(1)-C(1D) | 117.62(11) | N(1)-P(1)-C(1F) | 108.43(11) |

|                   |            |                   |            |
|-------------------|------------|-------------------|------------|
| C(1D)-P(1)-C(1F)  | 107.14(11) | C(1D)-P(1)-C(1E)  | 105.45(11) |
| N(1)-P(1)-C(1E)   | 112.56(11) | C(1F)-P(1)-C(1E)  | 104.78(11) |
|                   |            | C(1B)-C(1)-S(1)   | 109.86(14) |
| C(1B)-C(1)-C(1A)  | 112.85(18) | C(1A)-C(1)-S(1)   | 101.91(14) |
| C(1B)-C(1)-C(1C)  | 111.44(18) | C(1C)-C(1)-S(1)   | 111.64(15) |
| C(1A)-C(1)-C(1C)  | 108.79(17) |                   |            |
|                   |            |                   |            |
| C(6A)-C(1A)-C(2A) | 117.9(2)   | C(2D)-C(1D)-C(6D) | 119.4(2)   |
| C(6A)-C(1A)-C(1)  | 123.3(2)   | C(2D)-C(1D)-P(1)  | 121.7(2)   |
| C(2A)-C(1A)-C(1)  | 118.8(2)   | C(6D)-C(1D)-P(1)  | 118.83(19) |
| C(3A)-C(2A)-C(1A) | 121.0(2)   | C(1D)-C(2D)-C(3D) | 120.7(3)   |
| C(2A)-C(3A)-C(4A) | 120.1(3)   | C(4D)-C(3D)-C(2D) | 119.9(3)   |
| C(5A)-C(4A)-C(3A) | 119.5(2)   | C(3D)-C(4D)-C(5D) | 120.1(3)   |
| C(4A)-C(5A)-C(6A) | 120.7(3)   | C(4D)-C(5D)-C(6D) | 120.4(3)   |
| C(1A)-C(6A)-C(5A) | 120.8(3)   | C(1D)-C(6D)-C(5D) | 119.6(3)   |
| C(2B)-C(1B)-C(6B) | 117.7(2)   | C(2E)-C(1E)-C(6E) | 118.7(2)   |
| C(2B)-C(1B)-C(1)  | 122.8(2)   | C(2E)-C(1E)-P(1)  | 122.5(2)   |
| C(6B)-C(1B)-C(1)  | 119.5(2)   | C(6E)-C(1E)-P(1)  | 118.48(19) |
| C(1B)-C(2B)-C(3B) | 121.3(2)   | C(1E)-C(2E)-C(3E) | 120.6(3)   |
| C(4B)-C(3B)-C(2B) | 119.9(2)   | C(4E)-C(3E)-C(2E) | 120.1(3)   |
| C(3B)-C(4B)-C(5B) | 119.8(2)   | C(5E)-C(4E)-C(3E) | 119.7(3)   |
| C(4B)-C(5B)-C(6B) | 120.2(2)   | C(4E)-C(5E)-C(6E) | 120.3(3)   |
| C(5B)-C(6B)-C(1B) | 121.0(2)   | C(1E)-C(6E)-C(5E) | 120.3(3)   |
| C(2C)-C(1C)-C(6C) | 118.2(2)   | C(2F)-C(1F)-C(6F) | 119.2(2)   |
| C(2C)-C(1C)-C(1)  | 120.0(2)   | C(2F)-C(1F)-P(1)  | 118.34(18) |
| C(6C)-C(1C)-C(1)  | 121.7(2)   | C(6F)-C(1F)-P(1)  | 122.4(2)   |
| C(1C)-C(2C)-C(3C) | 120.8(2)   | C(3F)-C(2F)-C(1F) | 120.2(2)   |
| C(4C)-C(3C)-C(2C) | 120.6(2)   | C(4F)-C(3F)-C(2F) | 120.0(3)   |
| C(3C)-C(4C)-C(5C) | 119.2(2)   | C(3F)-C(4F)-C(5F) | 120.3(3)   |
| C(4C)-C(5C)-C(6C) | 120.9(3)   | C(6F)-C(5F)-C(4F) | 120.5(3)   |
| C(5C)-C(6C)-C(1C) | 120.2(2)   | C(5F)-C(6F)-C(1F) | 119.8(3)   |

<sup>a</sup> The numbers in parentheses are the estimated standard deviations in the last significant digit.

<sup>b</sup> Atoms are labeled in agreement with Figures 1 -4.

Table 4. Anisotropic displacement parameters ( $\text{\AA}^2 \times 10^3$ ) for  $\text{C}_{37}\text{H}_{30}\text{NPS} - 0.5 \text{C}_7\text{H}_8$ . The anisotropic displacement factor exponent takes the form:  $-2\pi^2 [h^2 a^{*2} U^{11} + \dots + 2 h k a^* b^* U^{12}]$

|       | U11   | U22   | U33   | U23    | U13   | U12   |
|-------|-------|-------|-------|--------|-------|-------|
| S(1)  | 23(1) | 24(1) | 25(1) | -1(1)  | 1(1)  | 2(1)  |
| P(1)  | 22(1) | 23(1) | 29(1) | 3(1)   | 5(1)  | 3(1)  |
| N(1)  | 28(1) | 25(1) | 39(1) | 6(1)   | 11(1) | 6(1)  |
| C(1)  | 18(1) | 21(1) | 26(1) | -1(1)  | 2(1)  | 0(1)  |
| C(1A) | 25(1) | 22(1) | 27(1) | 3(1)   | 4(1)  | 4(1)  |
| C(2A) | 34(1) | 29(1) | 33(1) | -3(1)  | 5(1)  | 2(1)  |
| C(3A) | 54(2) | 37(2) | 32(1) | -5(1)  | 11(1) | 11(1) |
| C(4A) | 50(2) | 49(2) | 41(2) | 9(1)   | 25(1) | 18(1) |
| C(5A) | 33(1) | 50(2) | 60(2) | 2(2)   | 22(1) | 1(1)  |
| C(6A) | 29(1) | 33(1) | 45(2) | -4(1)  | 9(1)  | 1(1)  |
| C(1B) | 17(1) | 24(1) | 31(1) | -4(1)  | 3(1)  | 1(1)  |
| C(2B) | 28(1) | 30(1) | 33(1) | -2(1)  | 1(1)  | 3(1)  |
| C(3B) | 35(1) | 44(2) | 31(1) | -8(1)  | -3(1) | 3(1)  |
| C(4B) | 36(1) | 35(2) | 47(2) | -18(1) | 1(1)  | -4(1) |
| C(5B) | 32(1) | 25(1) | 50(2) | -5(1)  | 7(1)  | -3(1) |
| C(6B) | 25(1) | 27(1) | 34(1) | -2(1)  | 4(1)  | -2(1) |
| C(1C) | 29(1) | 22(1) | 21(1) | -1(1)  | 1(1)  | 0(1)  |
| C(2C) | 32(1) | 29(1) | 36(1) | 3(1)   | 4(1)  | 3(1)  |
| C(3C) | 50(2) | 25(1) | 36(1) | 4(1)   | -1(1) | 7(1)  |
| C(4C) | 63(2) | 26(1) | 38(2) | 7(1)   | 6(1)  | -5(1) |
| C(5C) | 46(2) | 42(2) | 50(2) | 13(1)  | 15(1) | -6(1) |
| C(6C) | 33(1) | 33(1) | 43(2) | 7(1)   | 9(1)  | 0(1)  |
| C(1D) | 23(1) | 26(1) | 36(1) | 7(1)   | 5(1)  | 5(1)  |
| C(2D) | 36(1) | 30(1) | 49(2) | 7(1)   | 2(1)  | -1(1) |
| C(3D) | 39(2) | 37(2) | 74(2) | 16(2)  | 0(2)  | -8(1) |
| C(4D) | 31(2) | 53(2) | 80(2) | 31(2)  | 15(2) | -2(1) |
| C(5D) | 43(2) | 63(2) | 49(2) | 19(2)  | 20(1) | 10(2) |
| C(6D) | 33(1) | 39(2) | 41(2) | 6(1)   | 10(1) | 4(1)  |
| C(1E) | 27(1) | 27(1) | 33(1) | -1(1)  | 6(1)  | 4(1)  |
| C(2E) | 30(1) | 55(2) | 59(2) | 23(2)  | 8(1)  | 7(1)  |

|       |       |       |       |        |       |       |
|-------|-------|-------|-------|--------|-------|-------|
| C(3E) | 33(2) | 68(2) | 58(2) | 21(2)  | 2(1)  | 14(2) |
| C(4E) | 26(1) | 52(2) | 60(2) | -9(2)  | -2(1) | 6(1)  |
| C(5E) | 33(2) | 34(2) | 83(2) | -6(2)  | 4(2)  | -7(1) |
| C(6E) | 33(1) | 29(1) | 58(2) | 5(1)   | 1(1)  | -1(1) |
| C(1F) | 28(1) | 27(1) | 33(1) | 0(1)   | 9(1)  | 1(1)  |
| C(2F) | 33(1) | 36(1) | 34(1) | 3(1)   | 10(1) | 6(1)  |
| C(3F) | 40(2) | 51(2) | 31(1) | 1(1)   | 6(1)  | 2(1)  |
| C(4F) | 46(2) | 53(2) | 34(1) | -9(1)  | 13(1) | -1(1) |
| C(5F) | 47(2) | 48(2) | 52(2) | -10(1) | 17(1) | 13(1) |
| C(6F) | 36(2) | 45(2) | 40(2) | -2(1)  | 4(1)  | 13(1) |

Disordered Toluene of Crystallization<sup>d</sup>

|       |        |         |         |       |        |        |
|-------|--------|---------|---------|-------|--------|--------|
| C(1G) | 50(5)  | 202(10) | 87(8)   | 60(7) | 11(5)  | -25(4) |
| C(2G) | 52(5)  | 207(10) | 101(8)  | 99(7) | 10(5)  | 3(5)   |
| C(3G) | 63(6)  | 263(13) | 98(8)   | 41(8) | 6(6)   | 17(7)  |
| C(4G) | 82(7)  | 268(13) | 55(6)   | 37(8) | -3(6)  | -21(7) |
| C(5G) | 46(5)  | 255(13) | 119(9)  | 18(8) | -10(5) | -40(6) |
| C(6G) | 52(5)  | 222(12) | 185(13) | 31(9) | 11(8)  | -28(6) |
| C(7G) | 106(9) | 175(10) | 122(11) | 82(7) | 7(7)   | -57(7) |

<sup>a</sup> The numbers in parentheses are the estimated standard deviations in the last significant digit.

<sup>b</sup> The form of the anisotropic thermal parameter is:  $\exp[-2\pi^2 (U_{11}h^2a^{*2} + U_{22}k^2b^{*2} + U_{33}l^2c^{*2} + 2U_{12}hka^*b^* + 2U_{13}hla^*c^* + 2U_{23}klb^*c^*)]$ .

<sup>c</sup> Atoms are labeled in agreement with Figures 1 - 4.

<sup>d</sup> The toluene solvent molecule of crystallization lies on a crystallographic inversion center at  $\frac{1}{2}, \frac{1}{2}, 0$  in the unit cell and is therefore disordered with two orientations in the crystal. Restraints were imposed on the positional and displacement parameters of the seven (half-occupancy) carbon atoms.



Table 5. Hydrogen coordinates ( $\times 10^4$ ) and isotropic displacement parameters ( $\text{\AA}^2 \times 10^3$ ) for  $\text{C}_{37}\text{H}_{30}\text{NPS} - 0.5 \text{C}_7\text{H}_8$

|       | x    | y     | z     | U(eq) |
|-------|------|-------|-------|-------|
| H(2A) | 1818 | 6076  | 2306  | 39    |
| H(3A) | 1011 | 6710  | 3145  | 49    |
| H(4A) | -221 | 5810  | 3018  | 53    |
| H(5A) | -617 | 4241  | 2074  | 55    |
| H(6A) | 188  | 3590  | 1233  | 42    |
| H(2B) | 1113 | 4290  | -502  | 37    |
| H(3B) | 641  | 2570  | -1315 | 46    |
| H(4B) | 554  | 571   | -758  | 48    |
| H(5B) | 944  | 294   | 611   | 43    |
| H(6B) | 1426 | 2001  | 1422  | 35    |
| H(2C) | 634  | 6305  | 507   | 39    |
| H(3C) | 790  | 8119  | -222  | 46    |
| H(4C) | 1978 | 8574  | -539  | 52    |
| H(5C) | 3010 | 7178  | -151  | 54    |
| H(6C) | 2869 | 5357  | 579   | 43    |
| H(2D) | 2603 | -455  | 1040  | 47    |
| H(3D) | 1961 | -1791 | 1772  | 62    |
| H(4D) | 1969 | -1340 | 3096  | 65    |
| H(5D) | 2576 | 491   | 3679  | 60    |
| H(6D) | 3220 | 1843  | 2951  | 44    |
| H(2E) | 4482 | 233   | 2419  | 57    |
| H(3E) | 5809 | 243   | 2965  | 65    |
| H(4E) | 6568 | 1958  | 2740  | 57    |
| H(5E) | 6038 | 3516  | 1835  | 61    |
| H(6E) | 4711 | 3519  | 1287  | 49    |
| H(2F) | 2471 | 2245  | -160  | 41    |
| H(3F) | 2366 | 1324  | -1414 | 49    |
| H(4F) | 3233 | -240  | -1612 | 53    |
| H(5F) | 4197 | -922  | -563  | 57    |
| H(6F) | 4306 | -38   | 697   | 49    |

Disordered Toluene of Crystallization

|       |      |      |      |     |
|-------|------|------|------|-----|
| H(2G) | 3836 | 4734 | -159 | 145 |
| H(3G) | 4172 | 6639 | 489  | 171 |
| H(4G) | 5458 | 7232 | 841  | 165 |
| H(5G) | 6412 | 5936 | 462  | 173 |
| H(6G) | 6079 | 4049 | -200 | 186 |

---

<sup>a</sup> Hydrogen atoms were included in the structure factor calculations as idealized atoms (assuming  $sp^2$ - hybridization of the carbon atoms and C-H bond lengths of 0.95Å) "riding" on their respective carbon atoms. The isotropic thermal parameters of the hydrogen atoms were fixed at values 1.2(non-methyl) times the equivalent isotropic thermal parameters of the carbon atoms to which they are covalently bonded. Hydrogen atoms on the methyl group of the disordered toluene molecule were not included in the structural model.

<sup>b</sup> Hydrogen atoms bonded to carbon are labeled with the same numerical and literal subscripts as their respective carbon atoms.

Table 6. Torsion angles [°] for C<sub>37</sub>H<sub>30</sub>NPS – 0.5 C<sub>7</sub>H<sub>8</sub>

---

|                         |             |
|-------------------------|-------------|
| C(1D)-P(1)-N(1)-S(1)    | 19.9(2)     |
| C(1F)-P(1)-N(1)-S(1)    | 141.56(15)  |
| C(1E)-P(1)-N(1)-S(1)    | -102.99(16) |
| C(1)-S(1)-N(1)-P(1)     | -123.64(15) |
| N(1)-S(1)-C(1)-C(1B)    | 48.73(17)   |
| N(1)-S(1)-C(1)-C(1A)    | 168.60(14)  |
| N(1)-S(1)-C(1)-C(1C)    | -75.43(17)  |
| C(1B)-C(1)-C(1A)-C(6A)  | -8.3(3)     |
| C(1C)-C(1)-C(1A)-C(6A)  | 115.9(2)    |
| S(1)-C(1)-C(1A)-C(6A)   | -126.0(2)   |
| C(1B)-C(1)-C(1A)-C(2A)  | 175.1(2)    |
| C(1C)-C(1)-C(1A)-C(2A)  | -60.7(3)    |
| S(1)-C(1)-C(1A)-C(2A)   | 57.3(2)     |
| C(6A)-C(1A)-C(2A)-C(3A) | -0.7(4)     |
| C(1)-C(1A)-C(2A)-C(3A)  | 176.1(2)    |
| C(1A)-C(2A)-C(3A)-C(4A) | -0.2(4)     |
| C(2A)-C(3A)-C(4A)-C(5A) | 0.9(4)      |
| C(3A)-C(4A)-C(5A)-C(6A) | -0.8(4)     |
| C(2A)-C(1A)-C(6A)-C(5A) | 0.8(4)      |
| C(1)-C(1A)-C(6A)-C(5A)  | -175.9(2)   |
| C(4A)-C(5A)-C(6A)-C(1A) | -0.1(4)     |
| C(1A)-C(1)-C(1B)-C(2B)  | 114.1(2)    |
| C(1C)-C(1)-C(1B)-C(2B)  | -8.6(3)     |
| S(1)-C(1)-C(1B)-C(2B)   | -132.9(2)   |
| C(1A)-C(1)-C(1B)-C(6B)  | -64.8(3)    |
| C(1C)-C(1)-C(1B)-C(6B)  | 172.46(19)  |
| S(1)-C(1)-C(1B)-C(6B)   | 48.2(2)     |
| C(6B)-C(1B)-C(2B)-C(3B) | 0.0(3)      |
| C(1)-C(1B)-C(2B)-C(3B)  | -178.9(2)   |
| C(1B)-C(2B)-C(3B)-C(4B) | 0.2(4)      |
| C(2B)-C(3B)-C(4B)-C(5B) | -0.2(4)     |
| C(3B)-C(4B)-C(5B)-C(6B) | -0.2(4)     |
| C(4B)-C(5B)-C(6B)-C(1B) | 0.4(4)      |
| C(2B)-C(1B)-C(6B)-C(5B) | -0.4(3)     |

|                         |             |
|-------------------------|-------------|
| C(1)-C(1B)-C(6B)-C(5B)  | 178.6(2)    |
| C(1B)-C(1)-C(1C)-C(2C)  | 87.1(2)     |
| C(1A)-C(1)-C(1C)-C(2C)  | -38.0(3)    |
| S(1)-C(1)-C(1C)-C(2C)   | -149.67(19) |
| C(1B)-C(1)-C(1C)-C(6C)  | -91.4(3)    |
| C(1A)-C(1)-C(1C)-C(6C)  | 143.5(2)    |
| S(1)-C(1)-C(1C)-C(6C)   | 31.8(3)     |
| C(6C)-C(1C)-C(2C)-C(3C) | -0.7(4)     |
| C(1)-C(1C)-C(2C)-C(3C)  | -179.3(2)   |
| C(1C)-C(2C)-C(3C)-C(4C) | 0.0(4)      |
| C(2C)-C(3C)-C(4C)-C(5C) | 0.8(4)      |
| C(3C)-C(4C)-C(5C)-C(6C) | -0.8(4)     |
| C(4C)-C(5C)-C(6C)-C(1C) | 0.0(4)      |
| C(2C)-C(1C)-C(6C)-C(5C) | 0.7(4)      |
| C(1)-C(1C)-C(6C)-C(5C)  | 179.2(2)    |
| N(1)-P(1)-C(1D)-C(2D)   | 114.9(2)    |
| C(1F)-P(1)-C(1D)-C(2D)  | -7.4(2)     |
| C(1E)-P(1)-C(1D)-C(2D)  | -118.7(2)   |
| N(1)-P(1)-C(1D)-C(6D)   | -61.3(2)    |
| C(1F)-P(1)-C(1D)-C(6D)  | 176.39(19)  |
| C(1E)-P(1)-C(1D)-C(6D)  | 65.2(2)     |
| C(6D)-C(1D)-C(2D)-C(3D) | -0.6(4)     |
| P(1)-C(1D)-C(2D)-C(3D)  | -176.8(2)   |
| C(1D)-C(2D)-C(3D)-C(4D) | -0.4(4)     |
| C(2D)-C(3D)-C(4D)-C(5D) | 1.3(4)      |
| C(3D)-C(4D)-C(5D)-C(6D) | -1.2(4)     |
| C(2D)-C(1D)-C(6D)-C(5D) | 0.7(4)      |
| P(1)-C(1D)-C(6D)-C(5D)  | 177.0(2)    |
| C(4D)-C(5D)-C(6D)-C(1D) | 0.2(4)      |
| N(1)-P(1)-C(1E)-C(2E)   | 150.3(2)    |
| C(1D)-P(1)-C(1E)-C(2E)  | 20.8(3)     |
| C(1F)-P(1)-C(1E)-C(2E)  | -92.1(2)    |
| N(1)-P(1)-C(1E)-C(6E)   | -36.4(2)    |
| C(1D)-P(1)-C(1E)-C(6E)  | -165.8(2)   |
| C(1F)-P(1)-C(1E)-C(6E)  | 81.3(2)     |
| C(6E)-C(1E)-C(2E)-C(3E) | 4.0(4)      |

|                         |           |
|-------------------------|-----------|
| P(1)-C(1E)-C(2E)-C(3E)  | 177.3(2)  |
| C(1E)-C(2E)-C(3E)-C(4E) | 0.3(5)    |
| C(2E)-C(3E)-C(4E)-C(5E) | -4.6(5)   |
| C(3E)-C(4E)-C(5E)-C(6E) | 4.7(5)    |
| C(2E)-C(1E)-C(6E)-C(5E) | -3.9(4)   |
| P(1)-C(1E)-C(6E)-C(5E)  | -177.5(2) |
| C(4E)-C(5E)-C(6E)-C(1E) | -0.4(5)   |
| N(1)-P(1)-C(1F)-C(2F)   | -28.8(2)  |
| C(1D)-P(1)-C(1F)-C(2F)  | 99.1(2)   |
| C(1E)-P(1)-C(1F)-C(2F)  | -149.2(2) |
| N(1)-P(1)-C(1F)-C(6F)   | 153.8(2)  |
| C(1D)-P(1)-C(1F)-C(6F)  | -78.3(2)  |
| C(1E)-P(1)-C(1F)-C(6F)  | 33.4(2)   |
| C(6F)-C(1F)-C(2F)-C(3F) | -0.7(4)   |
| P(1)-C(1F)-C(2F)-C(3F)  | -178.1(2) |
| C(1F)-C(2F)-C(3F)-C(4F) | -0.1(4)   |
| C(2F)-C(3F)-C(4F)-C(5F) | 0.5(4)    |
| C(3F)-C(4F)-C(5F)-C(6F) | -0.2(5)   |
| C(4F)-C(5F)-C(6F)-C(1F) | -0.7(5)   |
| C(2F)-C(1F)-C(6F)-C(5F) | 1.1(4)    |
| P(1)-C(1F)-C(6F)-C(5F)  | 178.4(2)  |
| C(6G)-C(1G)-C(2G)-C(3G) | 0.4       |
| C(7G)-C(1G)-C(2G)-C(3G) | -179.7    |
| C(1G)-C(2G)-C(3G)-C(4G) | -1.4      |
| C(2G)-C(3G)-C(4G)-C(5G) | 1.8       |
| C(3G)-C(4G)-C(5G)-C(6G) | -1.4      |
| C(4G)-C(5G)-C(6G)-C(1G) | 0.4       |
| C(2G)-C(1G)-C(6G)-C(5G) | 0.1       |
| C(7G)-C(1G)-C(6G)-C(5G) | -179.8    |

---

## FIGURE CAPTIONS

Figure 1.

shows a perspective drawing of the  $C_{37}H_{30}NPS$  molecule present in the solid state structure of  $C_{37}H_{30}NPS - 0.5 C_7H_8$ . The sulfur and phosphorous atoms are represented by a large cross-hatched and dotted sphere, respectively. The nitrogen atom is represented by a medium-sized shaded sphere and carbon and hydrogen atoms are represented by medium and small open spheres, respectively.

Figure 2.

shows a perspective drawing of the  $C_{37}H_{30}NPS$  molecule present in the solid state structure of  $C_{37}H_{30}NPS - 0.5 C_7H_8$ . Nonhydrogen atoms are represented by thermal vibration ellipsoids drawn to encompass 50% of their electron density. Hydrogen atoms are represented by arbitrarily-small spheres, which are in no way representative of their true thermal motion.

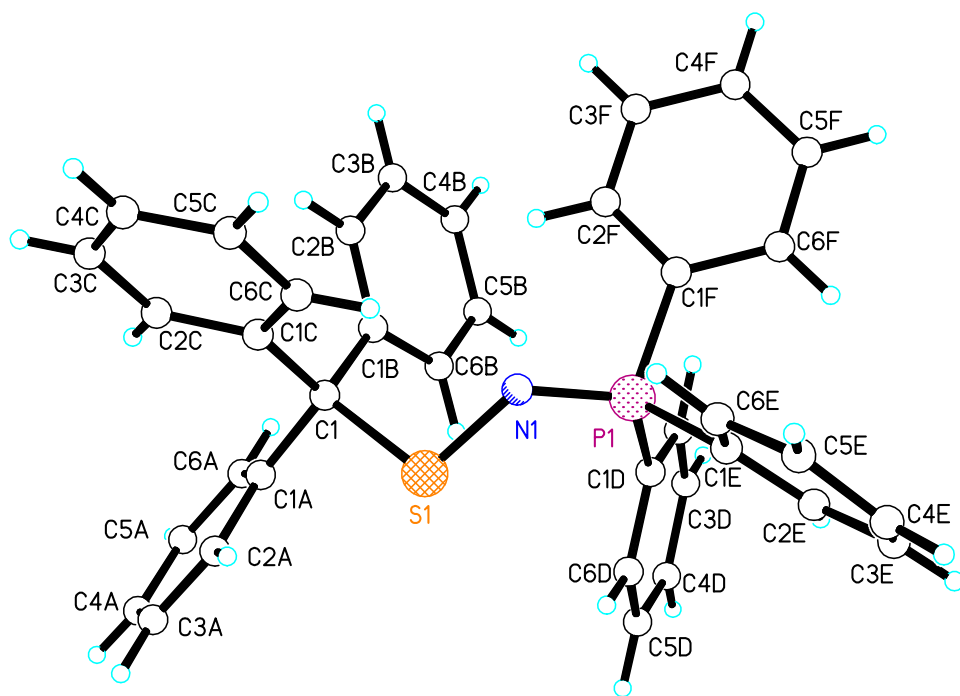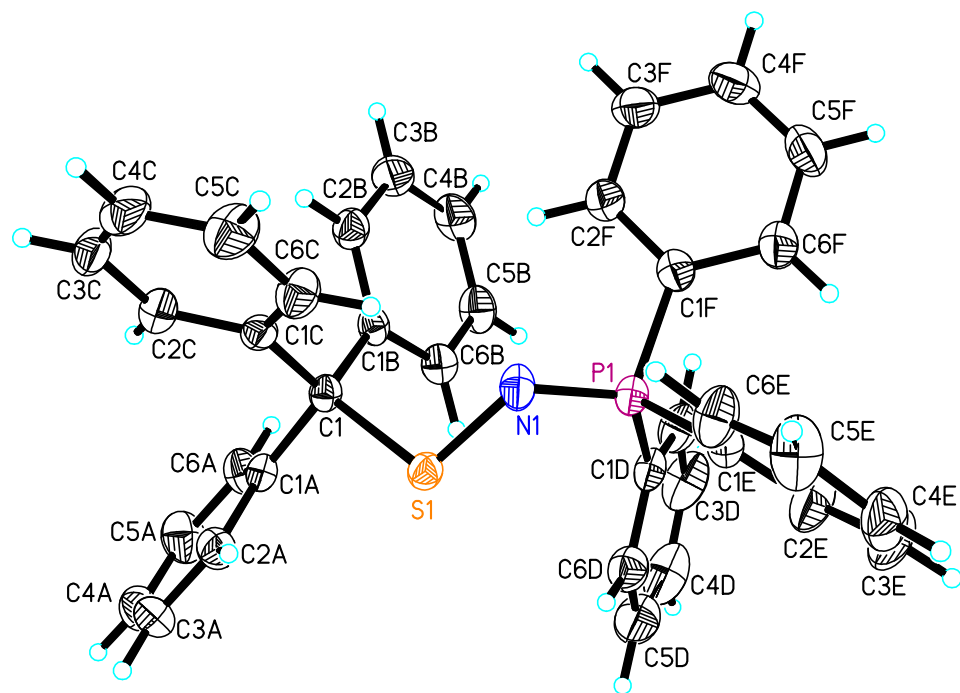

Supplement: NIHMS179960-supplement-1_si_001.pdf [file NIHMS179960-supplement-1_si_001.pdf]
